# Supplementary material for: Is a universal model to describe liquid–liquid extraction of cations by use of ionic liquids in reach?
Source: Royal Society of Chemistry journal article supplement (doi:10.1039/c3dt32159b), 2013-01-01
Supplement: c3dt32159b.pdf [file c3dt32159b.pdf]

### Supplementary materials

1-butyl-3-imidazolium bis(trifluorosulfonyl)imide ( $C_1C_4imTf_2N$ ) was purchased from Solvionic (purity: 99.5%, Verniolle, France) and dried prior to use according to a published procedure.<sup>35</sup>

0.5 mL of the IL phase was contacted with 0.5 mL of an aqueous phase of variable nitric acid concentration. Both phases were contacted in a mechanical shaker at room temperature ( $293K \pm 1$ ) for three hours followed by 2 min centrifugation. The concentration of  $Tf_2N^-$  (see figure below) in the aqueous phase was measured using  $^{19}F$  NMR (Bruker, 300 MHz) by mixing an appropriate volume of the sample with 100  $\mu$ L of an internal standard consisting of 50mM  $CF_3COONa$  in  $D_2O$ . The concentration of  $Tf_2N^-$  was obtained from the area ratio of the  $^{19}F$  NMR signal of  $Tf_2N^-$  ( $\delta_F = -80$ ppm;  $CFCl_3$ ) to the  $-CF_3$  peak of trifluoroacetate ( $\delta_F = -76.5$ ppm;  $CFCl_3$ ).<sup>14</sup>

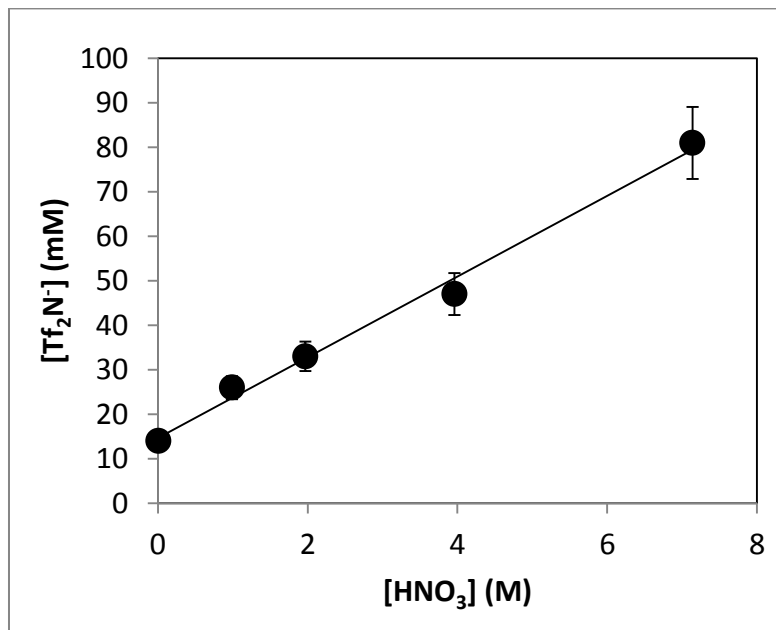

Fig. S1 : Variation of  $[Tf_2N^-]$  as a function of  $[HNO_3]$ . Solide line : linear fit.

Linear fit of the data:

$$[Tf_2N^-] = 9.1 \times 10^{-3} (\pm 0.3 \times 10^{-3}) [HNO_3]_{init} + 1.5 \times 10^{-3} (\pm 0.1 \times 10^{-3})$$
$$\chi^2 = 0.931$$
